# Supplementary material for: Exploring the emerging of electronic and magnetic properties with adatom adsorption on a novel semiconductor monolayer: N2P6
Source: Royal Society of Chemistry journal article supplement (doi:10.1039/d1cp03211a), 2021-01-01
Supplement: d1cp03211a1.pdf [file d1cp03211a1.pdf]

## Supporting Information

# Exploring the Emerging of Electronic and Magnetic Properties with Adatom Adsorption on Novel Semiconduction Monolayer: N<sub>2</sub>P<sub>6</sub>

Xinle Lu<sup>1,2</sup>, Liaoxin Sun<sup>2</sup>, Bing Fu<sup>3</sup>, Shoutian Sun<sup>1\*</sup> and Xiang Ye<sup>1\*</sup>

<sup>1</sup>*Department of Physics, Shanghai Normal University, Shanghai 200234, P. R. China*

<sup>2</sup>*State Key Laboratory of Infrared Physics, Chinese Academy of Sciences, Shanghai 200083, P. R. China*

<sup>3</sup>*Fuzhou Medical College of Nanchang University, Fuzhou 344000, P. R. China*

Corresponding Author: stsun@shnu.edu.cn (Shoutian Sun), yexiang@shnu.edu.cn (Xiang Ye)

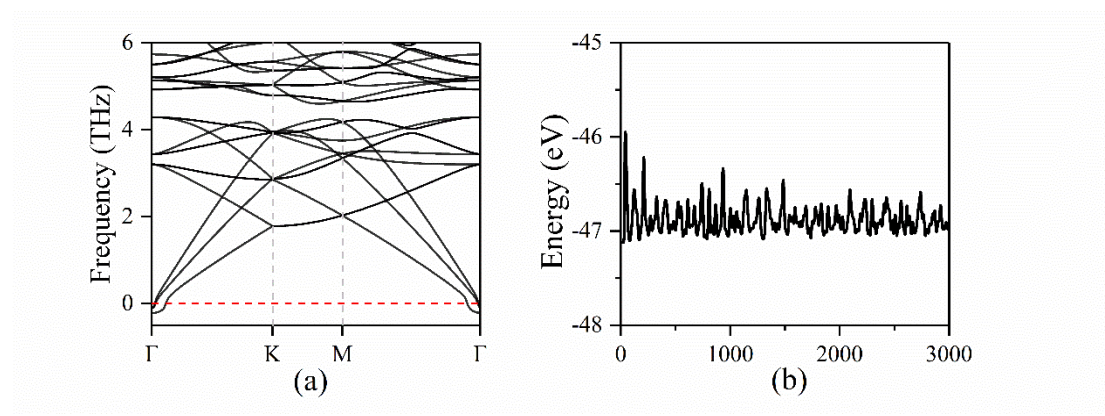

Figure S1. (a) The calculated phonon spectrum of N<sub>2</sub>P<sub>6</sub> monolayer. (b) The evolution of total energies on N<sub>2</sub>P<sub>6</sub> monolayer during FPMD simulation at 300 K.

---

\* Email address: stsun@shnu.edu.cn (Shoutian Sun), yexiang@shnu.edu.cn (Xiang Ye)

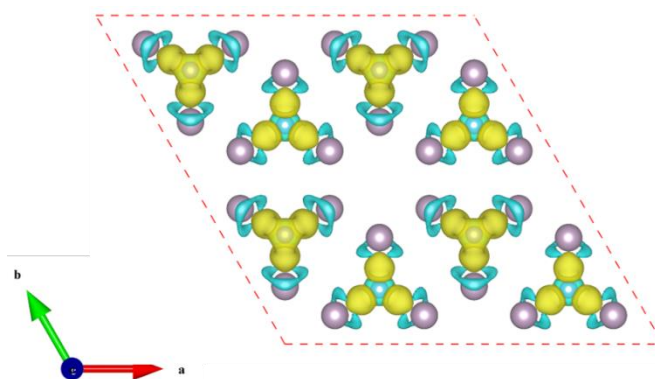

Figure S2. The top view of difference charge density with pristine  $N_2P_6$  (isosurfaces =  $0.01 \text{ e}(\text{\AA}^3)^{-1}$ ). Brown dots are  $P$  atoms, and others are  $N$  atoms.

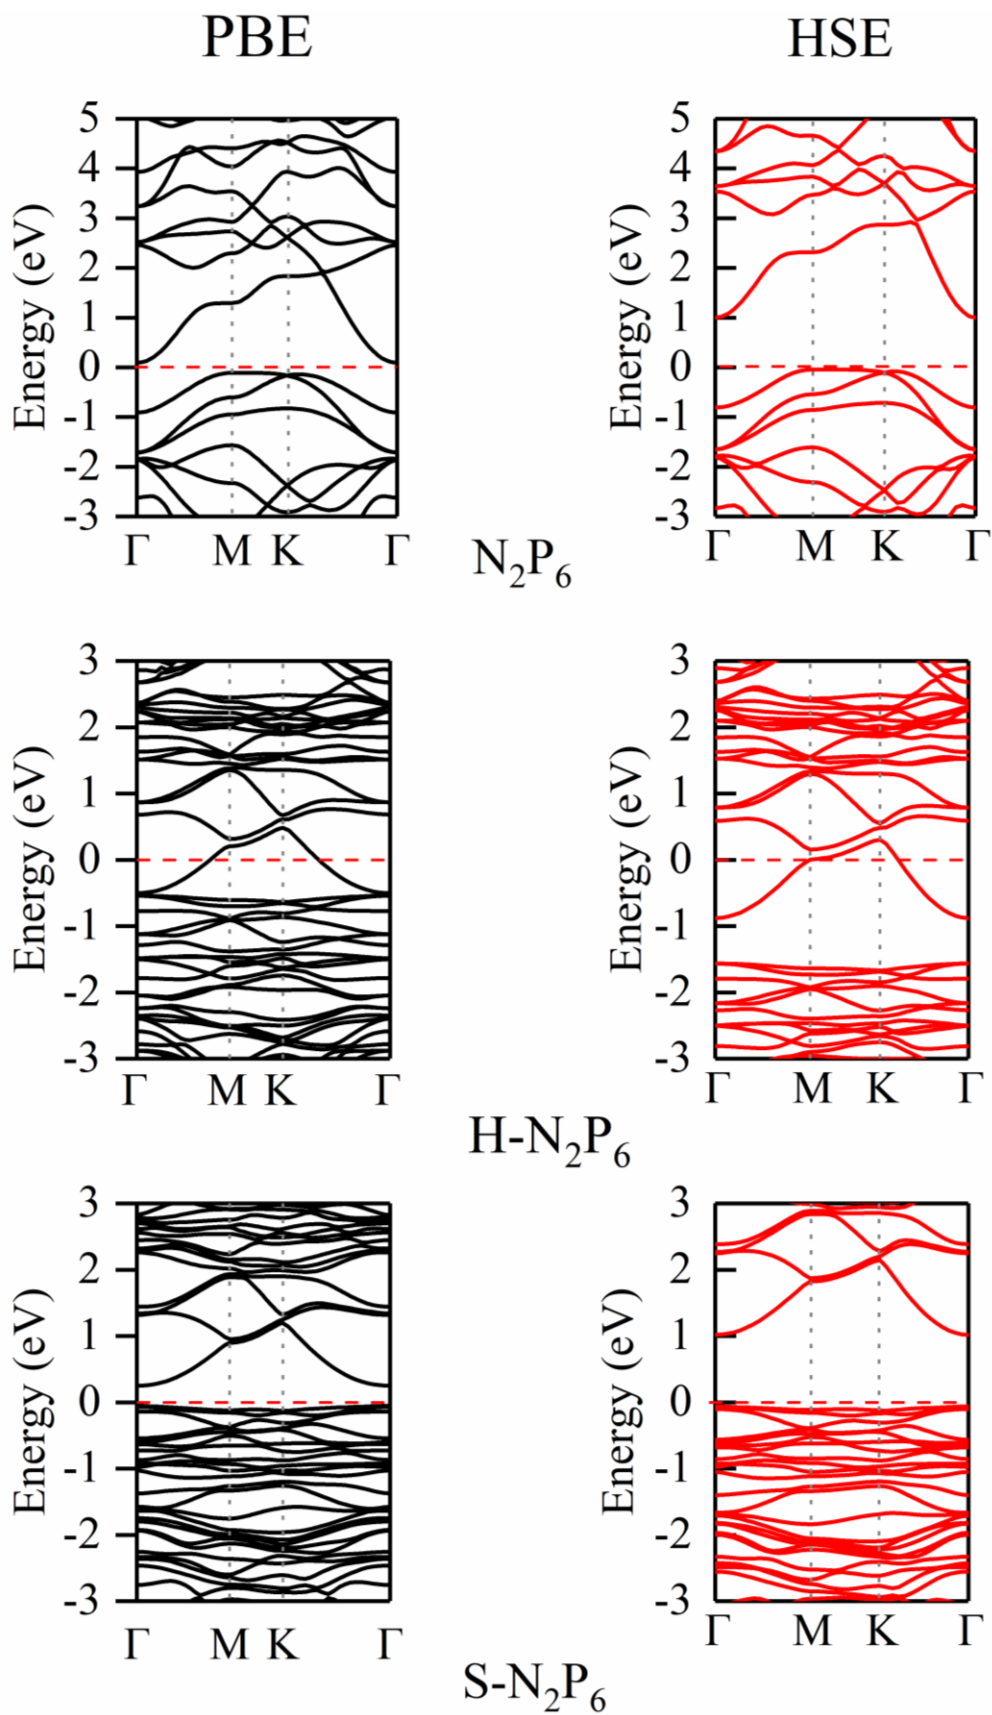

Figure S3: The band structures of three monolayers: (a)  $N_2P_6$ , (b)  $H-N_2P_6$  and (c)  $S-N_2P_6$  using PBE (left panel) and HSE06 (right panel), respectively. The Fermi level is set at 0 eV.

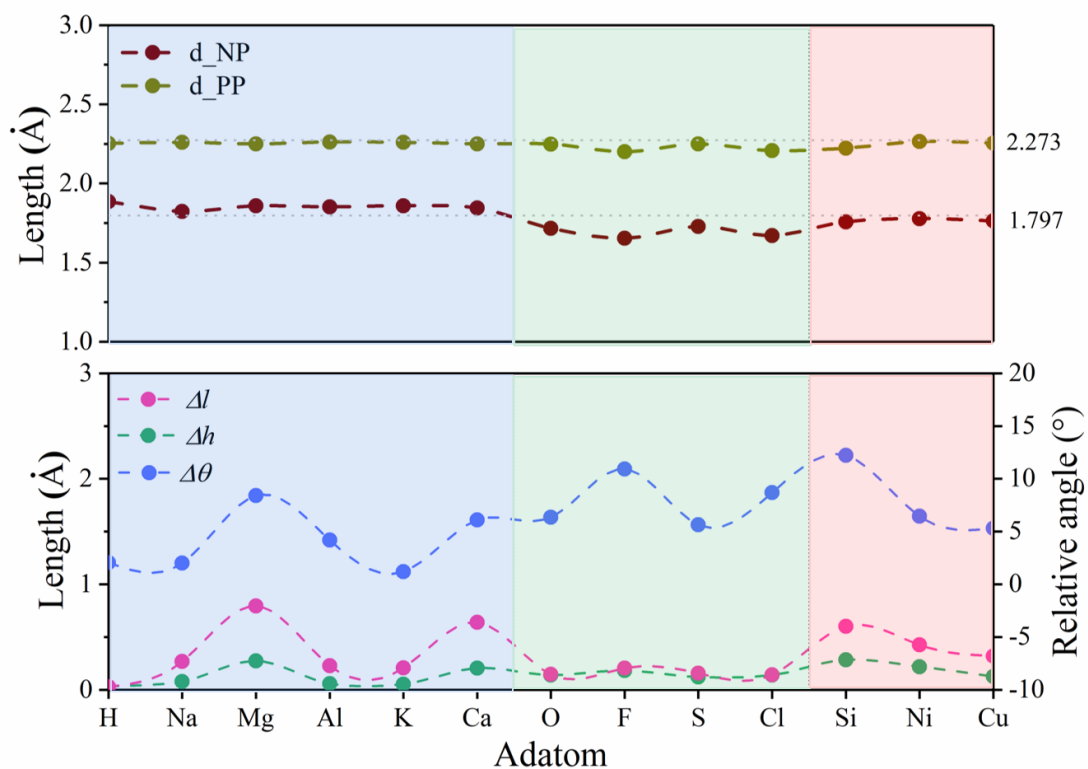

Figure S4. Variation of structural parameters for different adatoms adsorbed on  $N_2P_6$  at the TN (light blue area),  $T_P$  (light green area),  $H_{PP}$  (light red area) sites.  $\Delta l$  ( $\Delta l = l_p - p - l_p - p_{(sub0)}$ ) is used to describe in-plane distortion, and out-plane distortion is described by  $\Delta h$  ( $\Delta h = h - h_{sub0}$ ). Relative angle ( $\Delta\theta = \theta - \theta_0$ ,  $\theta_0 = 88.889^\circ$ ) is defined as the maximum variation of angle  $\theta$  made up by adatoms nearest P atom and its first and second bond length of P-P.

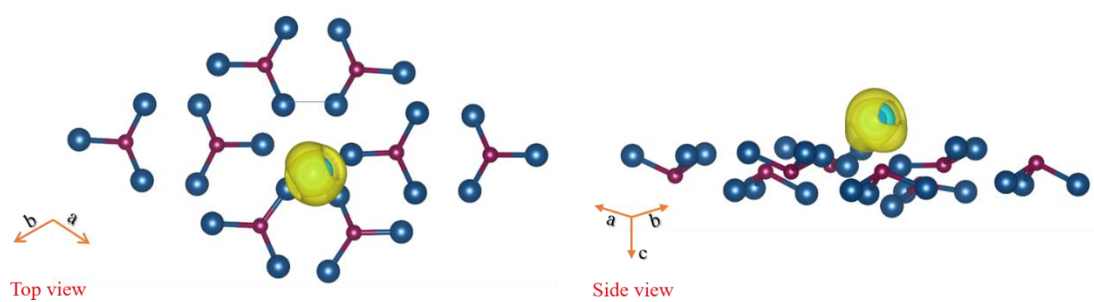

Figure S5. The top view and side view of difference charge density for P adatom adsorbed on pristine  $N_2P_6$  (isosurfaces =  $0.02 \text{ e}(\text{\AA}^3)^{-1}$ ). Brown dots are P atoms, and others are N atoms.
